# Supplementary material for: Ternary iron(ii) complex with an emissive imidazopyridine arm from Schiff base cyclizations and its oxidative DNA cleavage activity
Source: Royal Society of Chemistry journal article supplement (doi:10.1039/b415864d), 2004-12-06
Supplement: b415864d.doc [file b415864d.doc]

Ternary iron(II) complex with an emissive imidazopyridine arm from Schiff base cyclizations and its oxidative DNA cleavage activity

Arindam Mukherjee, Shanta Dhar, Munirathinam Nethaji, and Akhil R. Chakravarty*

Department of Inorganic and Physical Chemistry, Indian Institute of Science, Bangalore 560012, India. Fax: 91-80-23600683; Tel: 91-80-22932533; E-mail: arc@ipc.iisc.ernet.in

This submission was created using the RSC Article Template (DO NOT DELETE THIS TEXT)

(LINE INCLUDED FOR SPACING ONLY - DO NOT DELETE THIS TEXT)

Supplimentary Information


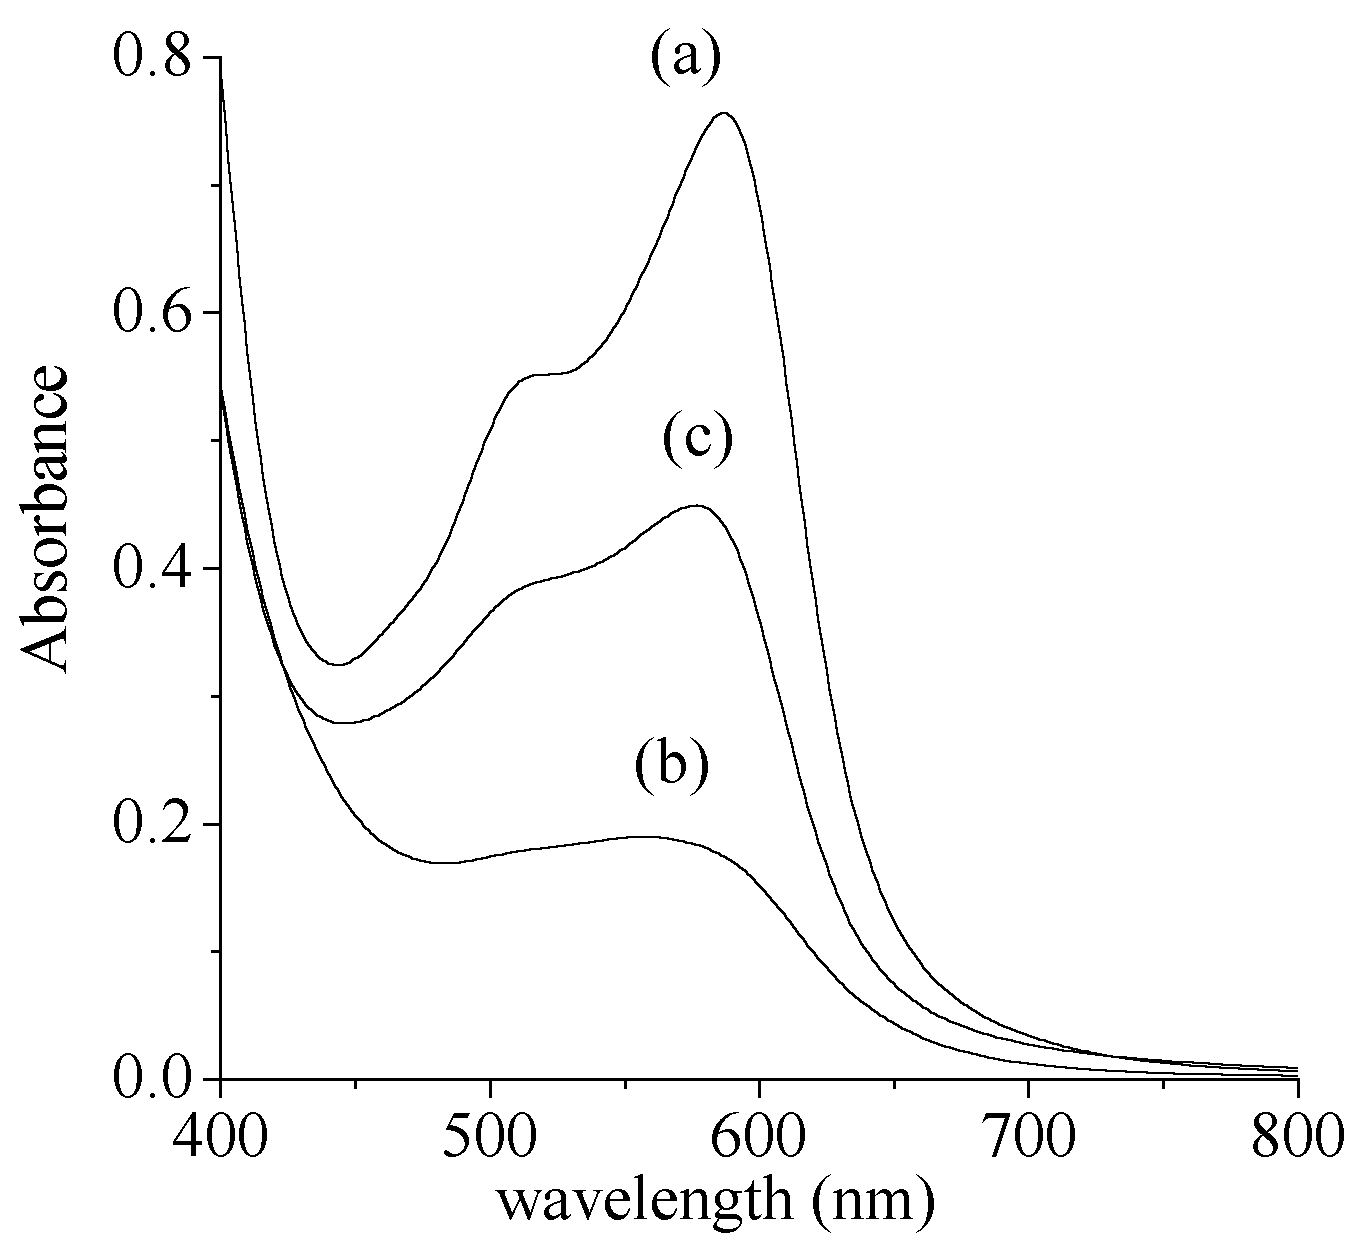


**Fig. S1** Visible spectral traces showing the conversion of **1** (a) to its oxidized species (b) on treatment with Ce(IV) ion and regeneration of ~50% of **1** on addition of sodium ascorbate (c) in 2% aqueous MeCN.


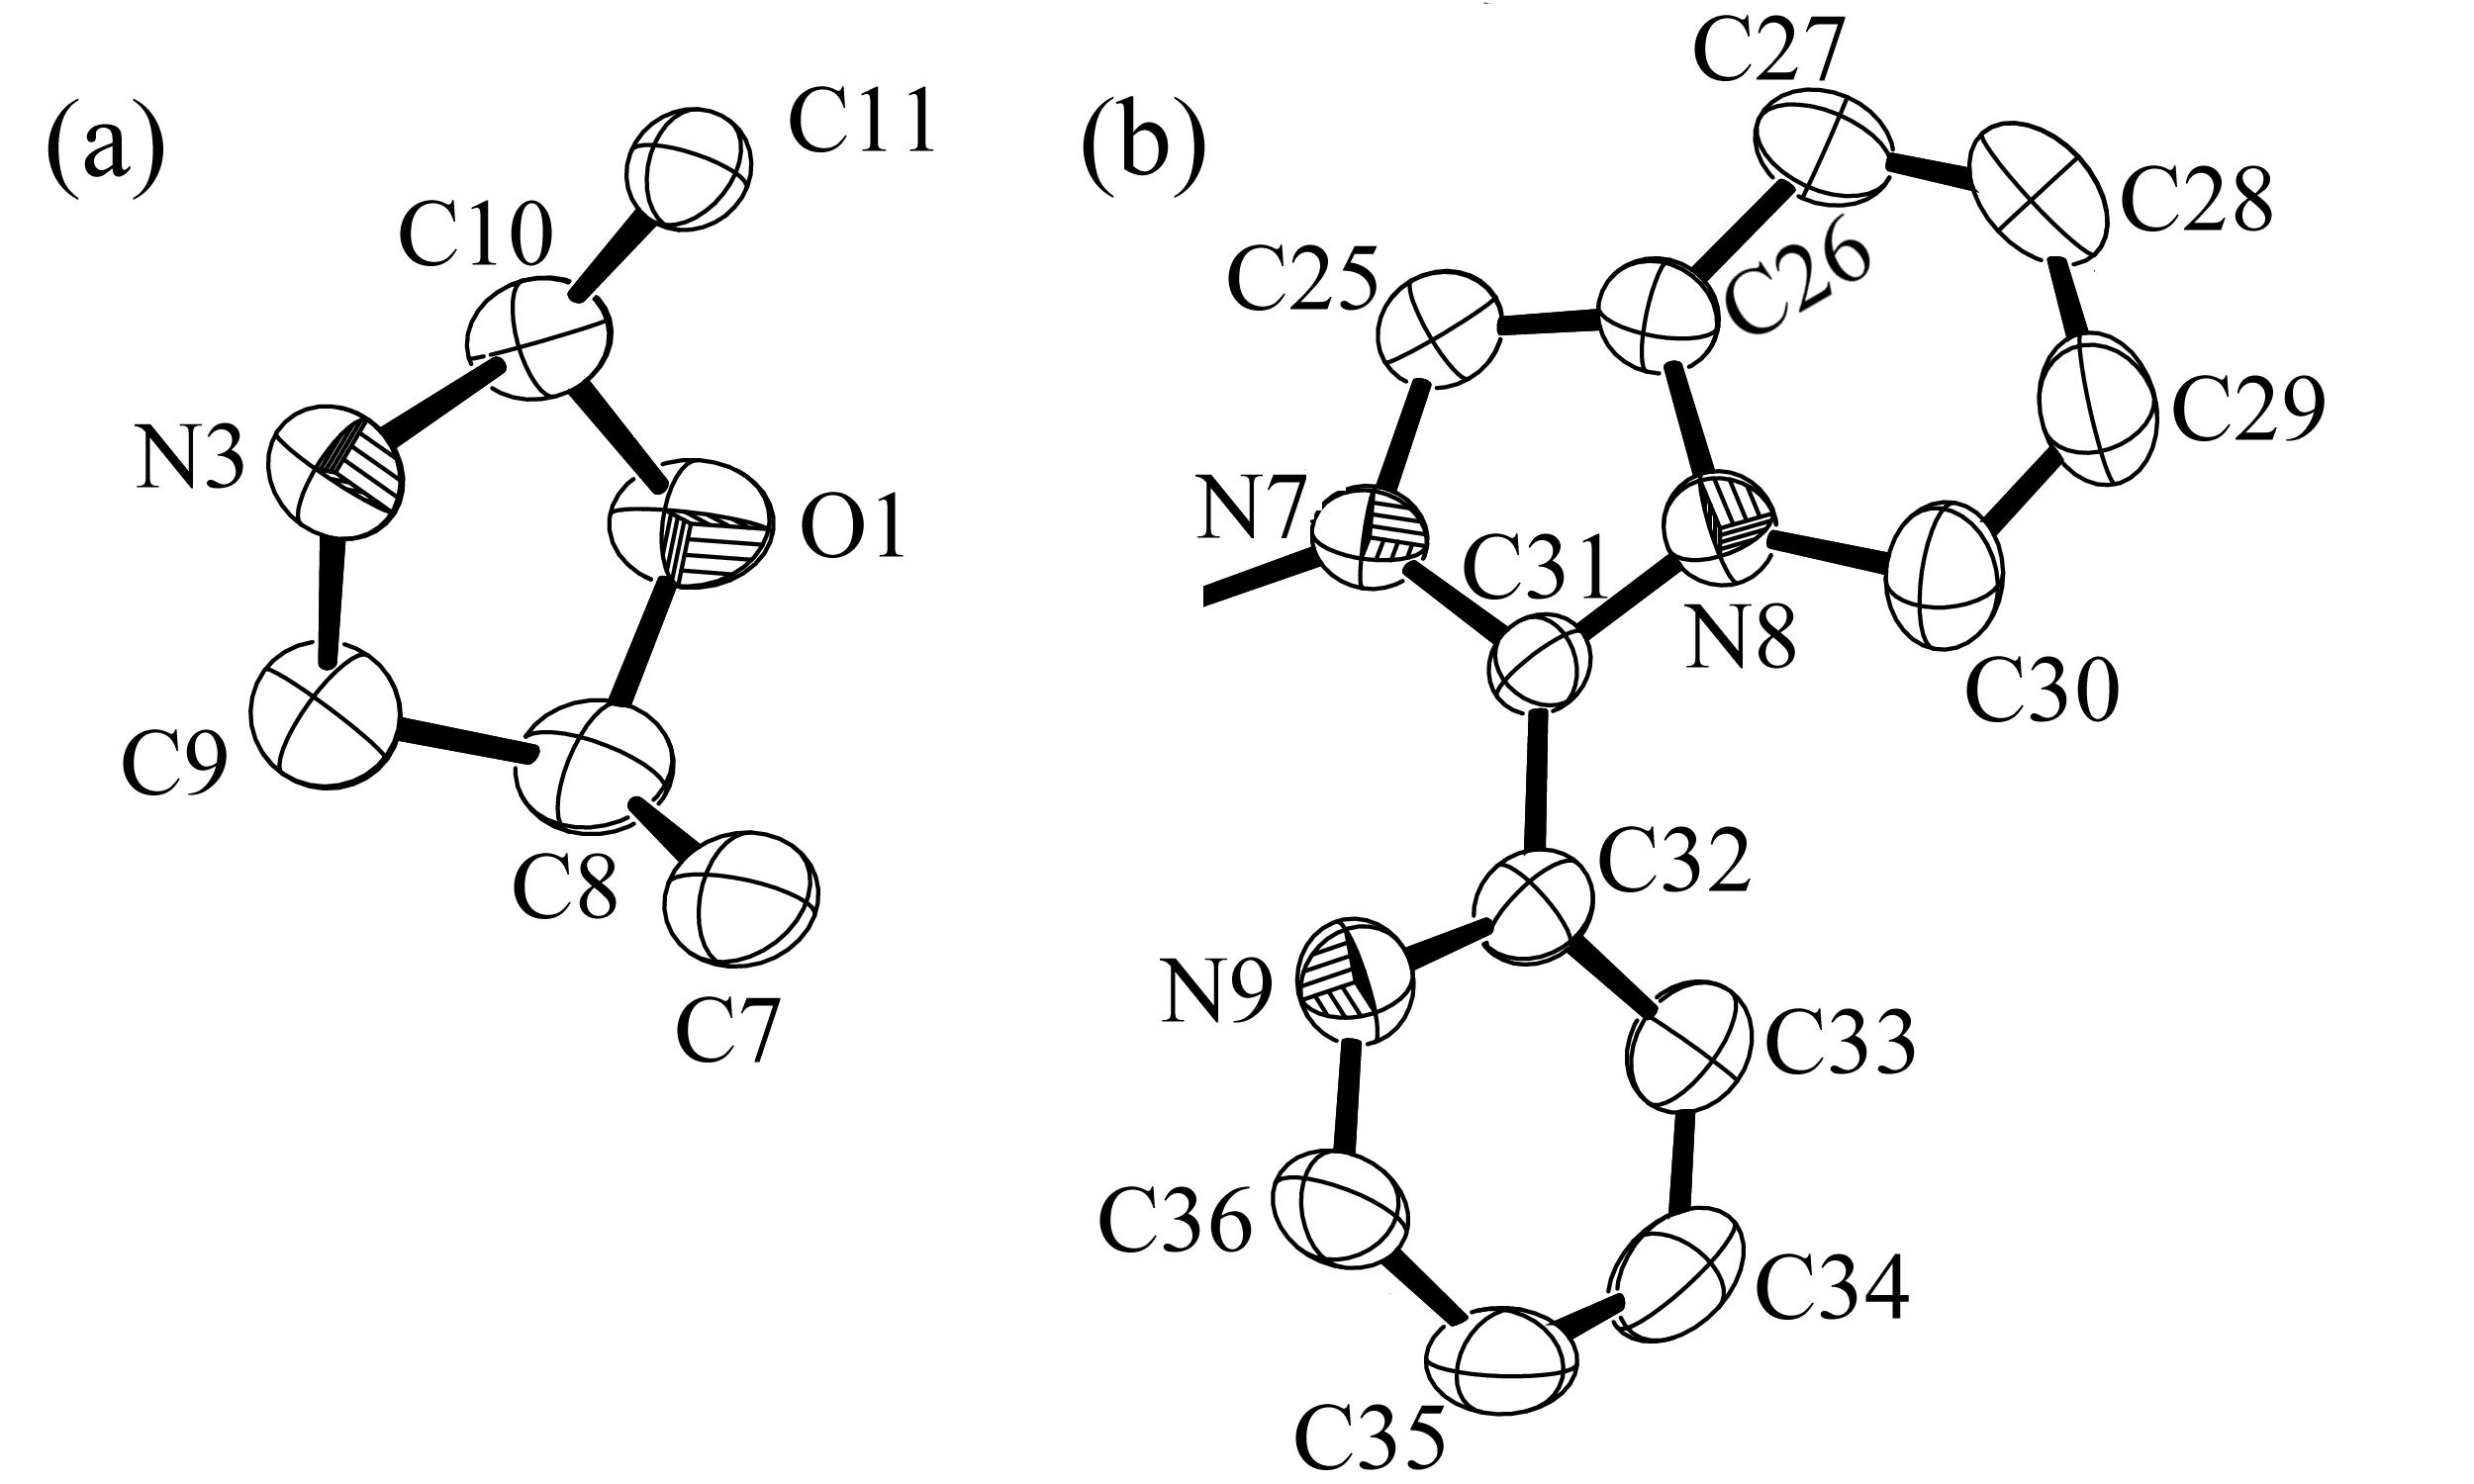


**Fig. S2** Structure of the five-membered ring of L’ (a) and imidazopyridine moiety of L” (b) from Schiff base cyclization reactions forming **1**.
